# Supplementary material for: A novel index of protein-protein interface propensity improves interface residue recognition
Source: PubMed Central journal article supplement (PMC5259823; doi:10.1186/s12918-016-0351-7), 2016-12-23

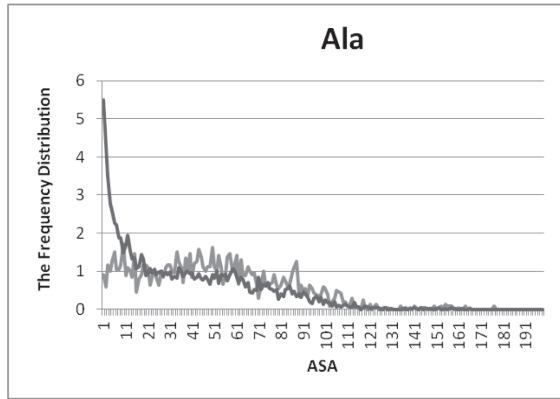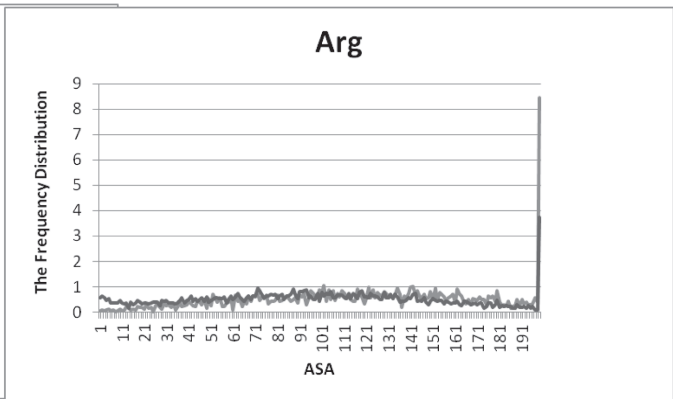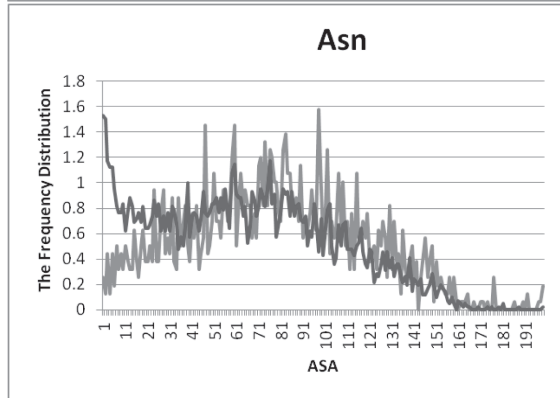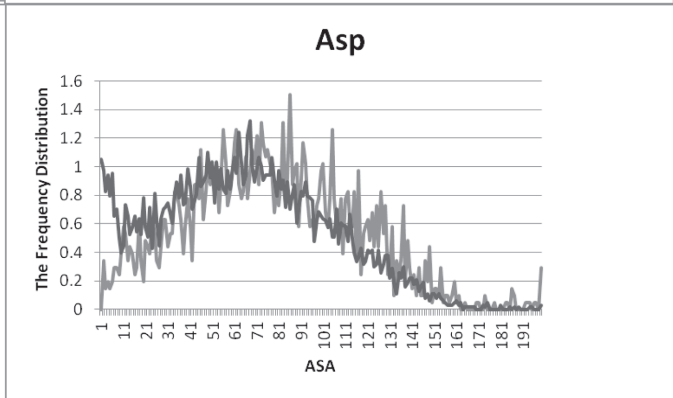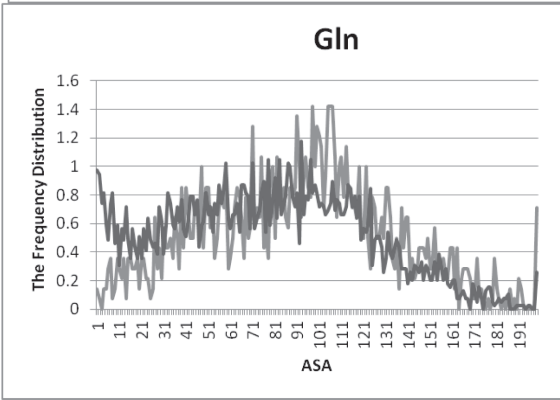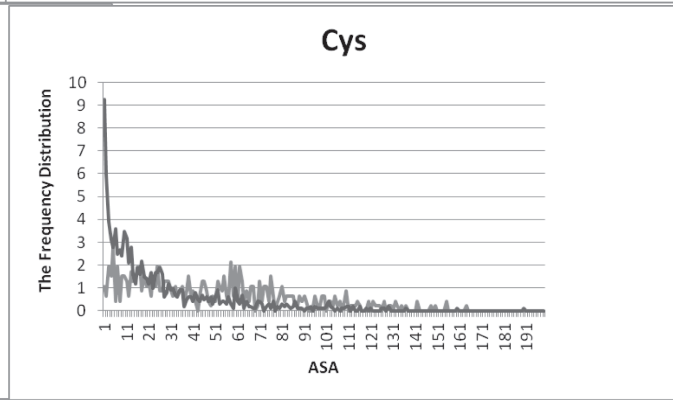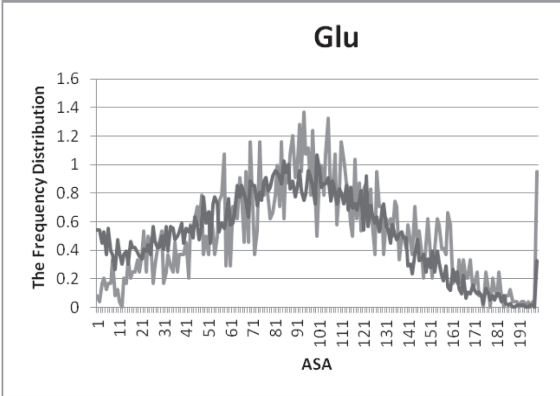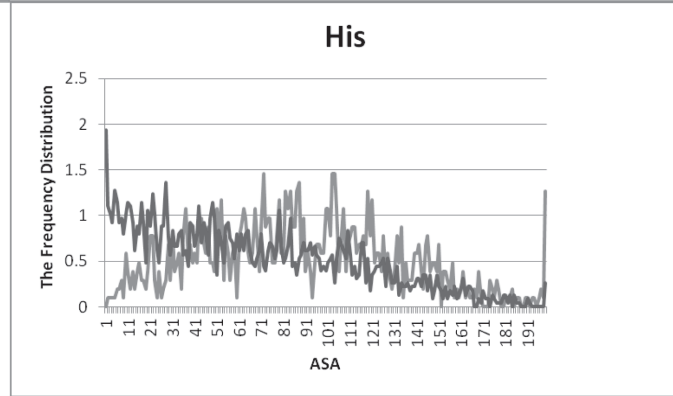

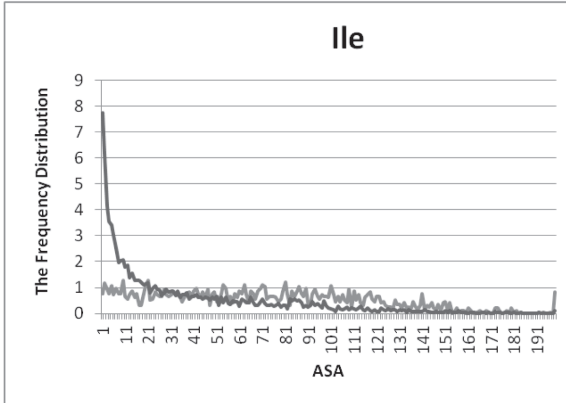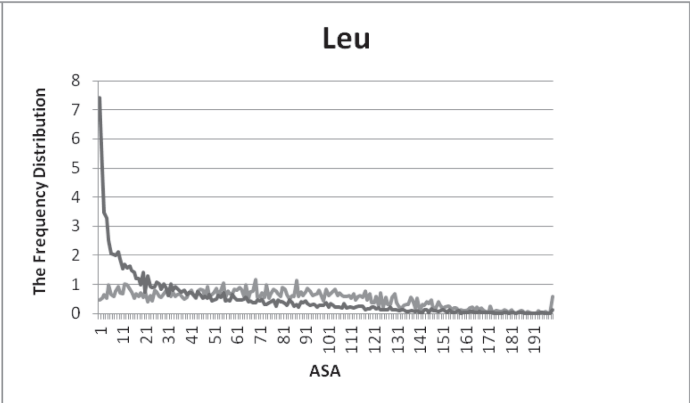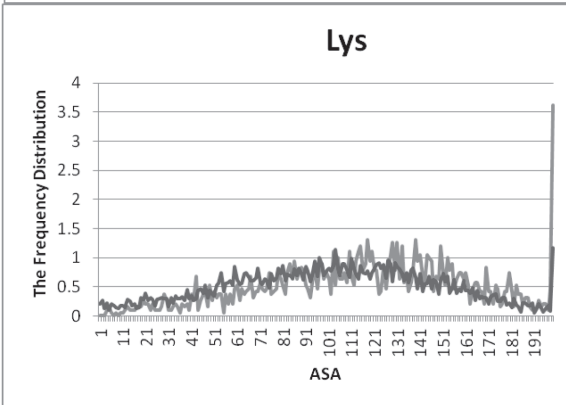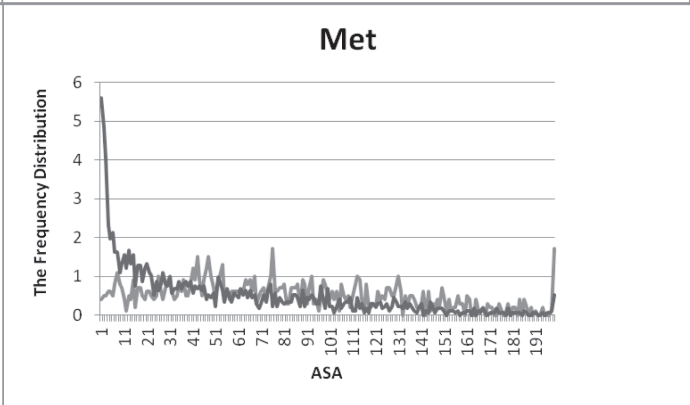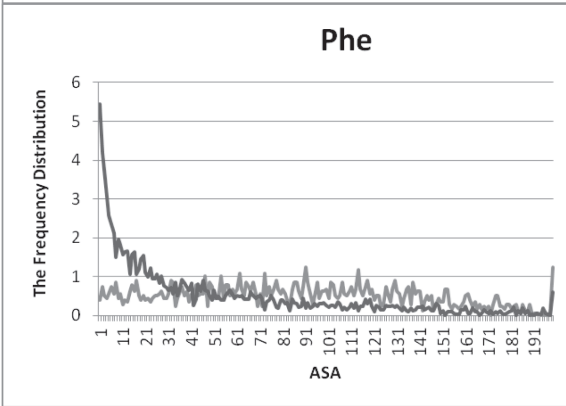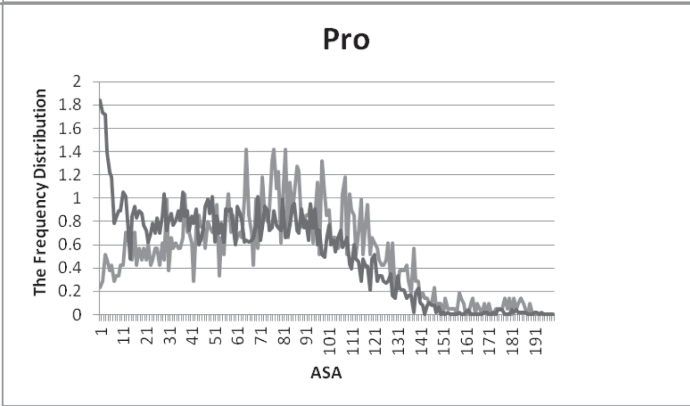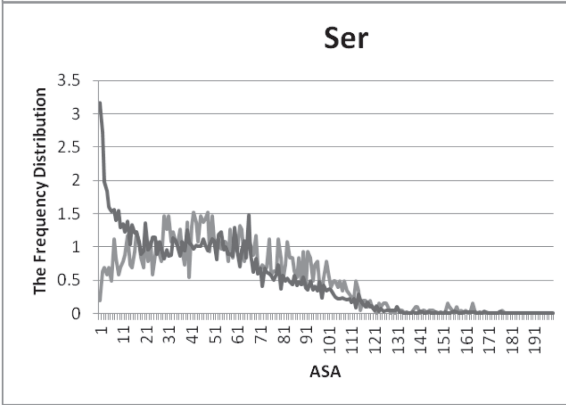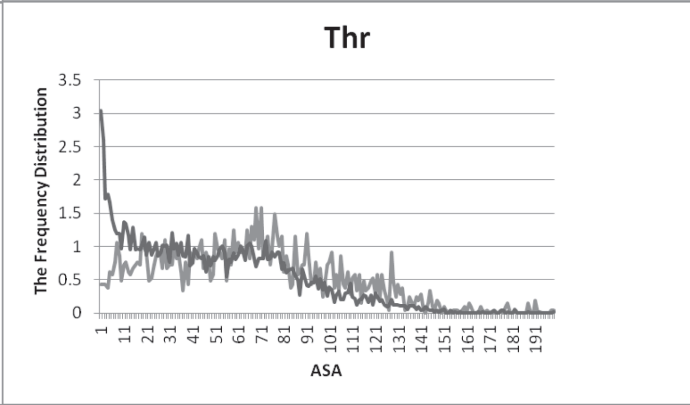

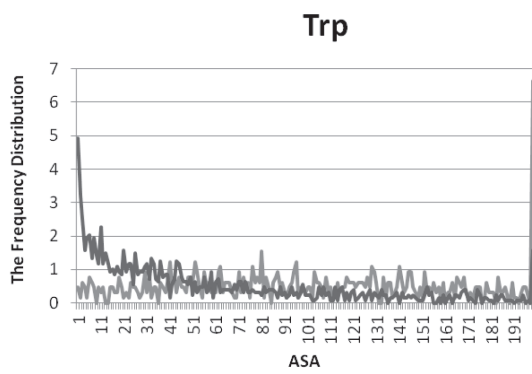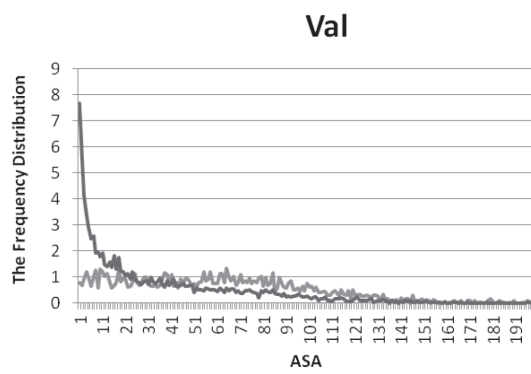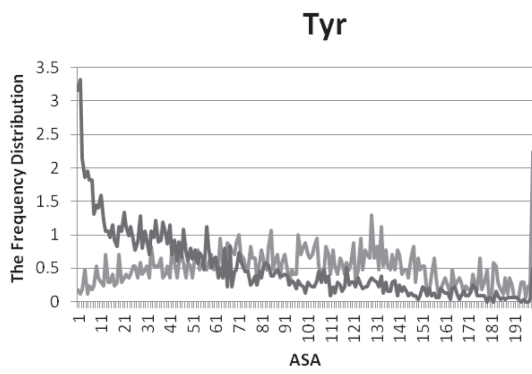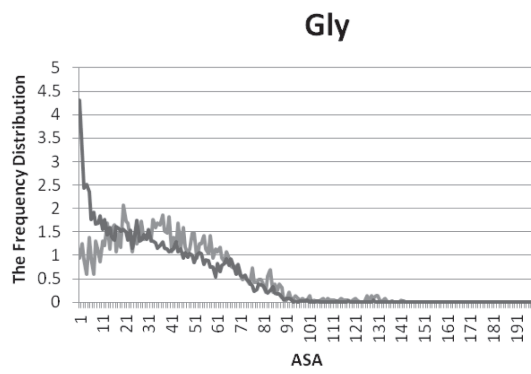

Supplement: 12918_2016_351_MOESM1_ESM.pdf [file 12918_2016_351_MOESM1_ESM.pdf]
